# Supplementary material for: Optimized electromagnetic enhancement and charge transfer in MXene/Au/Cu2O hybrids for achieving efficient SERS
Source: Royal Society of Chemistry journal article supplement (doi:10.1039/d3cp00887h), 2023-01-01
Supplement: d3cp00887h1.pdf [file d3cp00887h1.pdf]

# Optimized Electromagnetic Enhancement and Charge Transfer in MXene/Au/Cu<sub>2</sub>O Hybrids for Efficient SERS

*Yi-Xin Zhao*<sup>a</sup>, *Zi-Xing Zhen*<sup>a</sup>, *Liu-Shuai Zhang*<sup>a</sup>, *Jing-Ru Feng*<sup>b</sup>, *Liang Ma*<sup>a\*</sup>, *Si-Jing Ding*<sup>b\*</sup>

<sup>a</sup> Hubei Key Laboratory of Optical Information and Pattern Recognition, Wuhan Institute of Technology, Wuhan, 430205, P. R. China.

<sup>b</sup> School of Mathematics and Physics, China University of Geosciences (Wuhan), Wuhan, 430074, P. R. China.

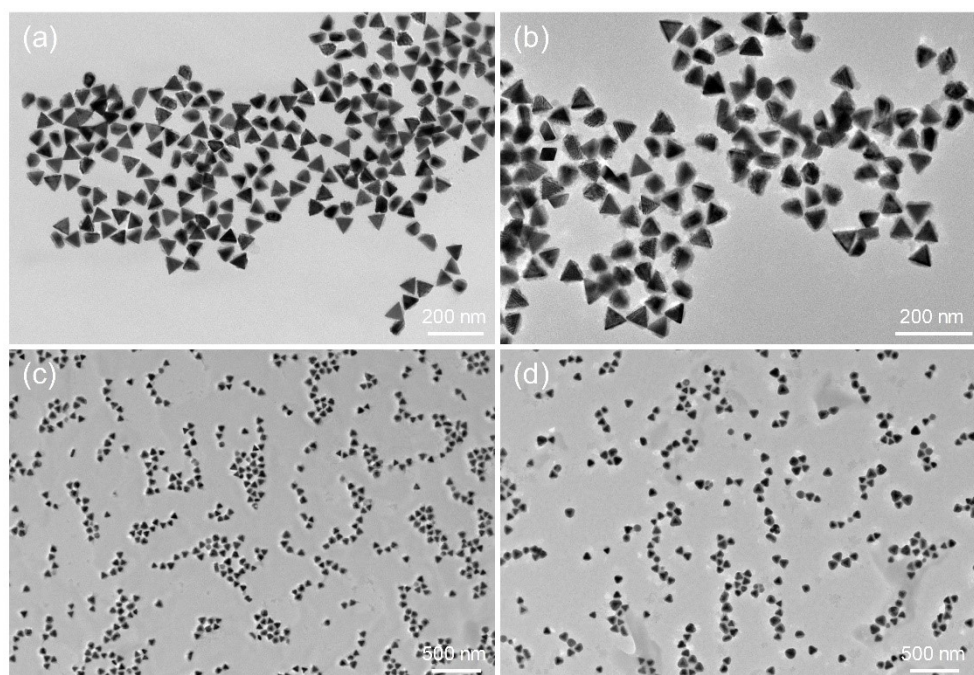

**Fig. S1** The large-scale TEM images of Au/Cu<sub>2</sub>O (700 nm) (a), Au/Cu<sub>2</sub>O (730 nm) (b), Au@Cu<sub>2</sub>O (810 nm) (c), and Au@Cu<sub>2</sub>O (950 nm) (d).

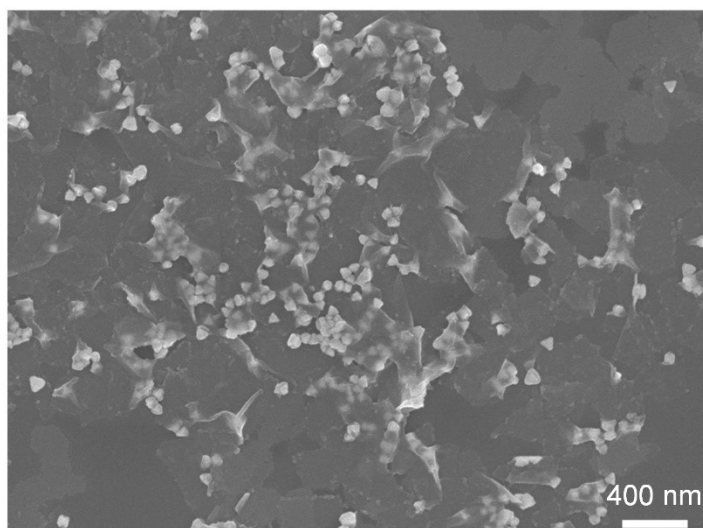

**Fig. S2** SEM image of MXene/Au/Cu<sub>2</sub>O hybrids.

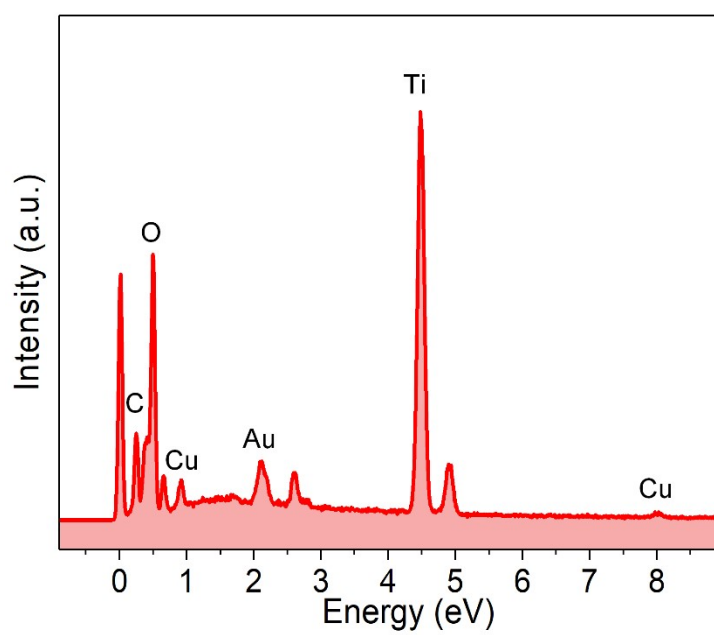

**Fig. S3** EDS spectrum of MXene/Au/Cu<sub>2</sub>O hybrids.

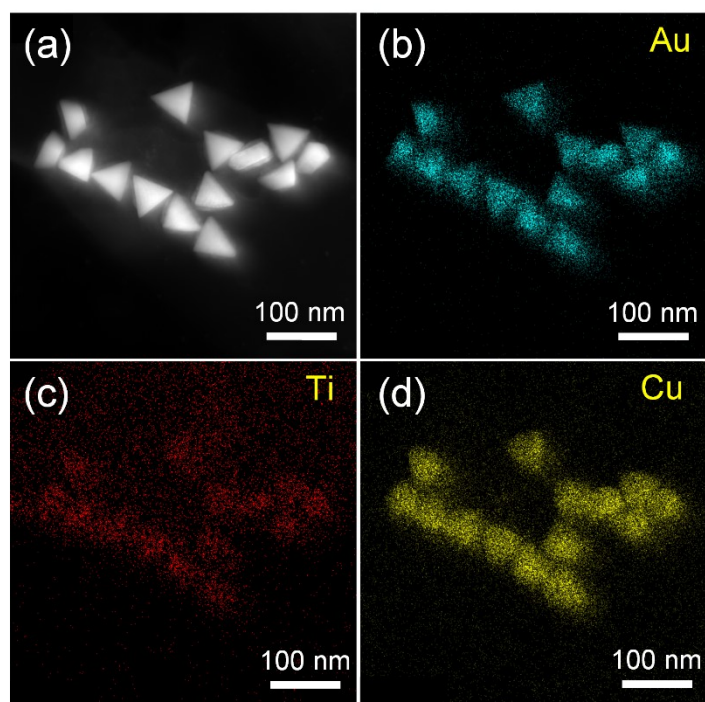

**Fig. S4** HAADF-STEM image (a) and corresponding elemental mappings (b-d) of MXene/Au/Cu<sub>2</sub>O hybrids.

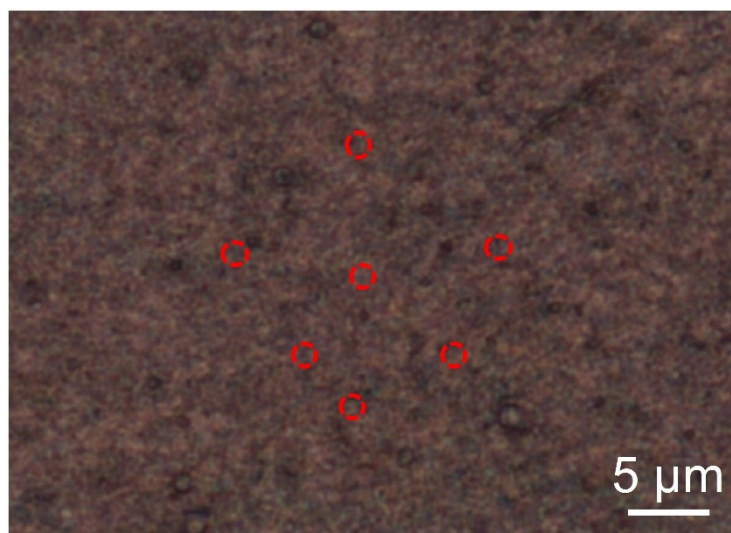

**Fig. S5** Optical microscope image of MXene/Au/Cu<sub>2</sub>O (730 nm) hybrids.

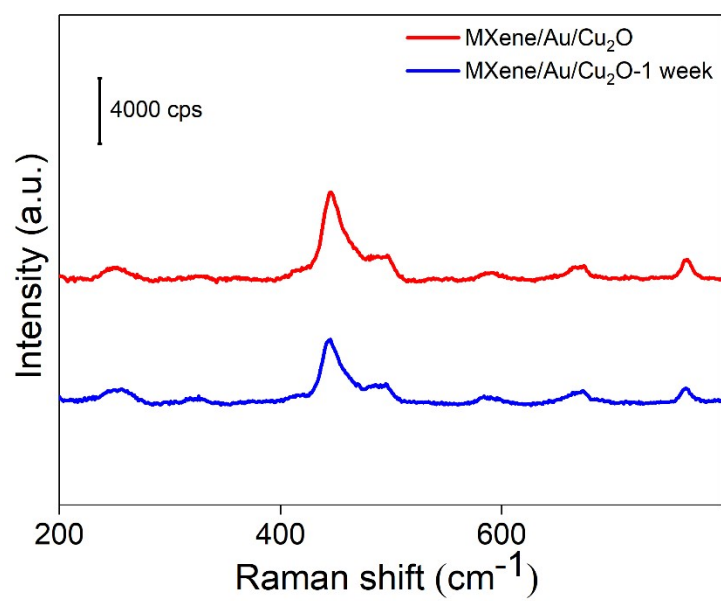

**Fig. S6** The SERS spectra of MB ( $10^{-6}$  M) obtained on the MXene/Au/Cu<sub>2</sub>O before and after storing for one week.
